# Supplementary material for: Comparative metabolomics of two nettle species unveils distinct high-altitude adaptation mechanisms on the Tibetan Plateau
Source: Springer Nature journal article supplement (doi:10.1186/s12870-025-06666-9), 2025-05-15
Supplement: MOESM3 [file 12870_2025_6666_MOESM3_ESM.pdf]

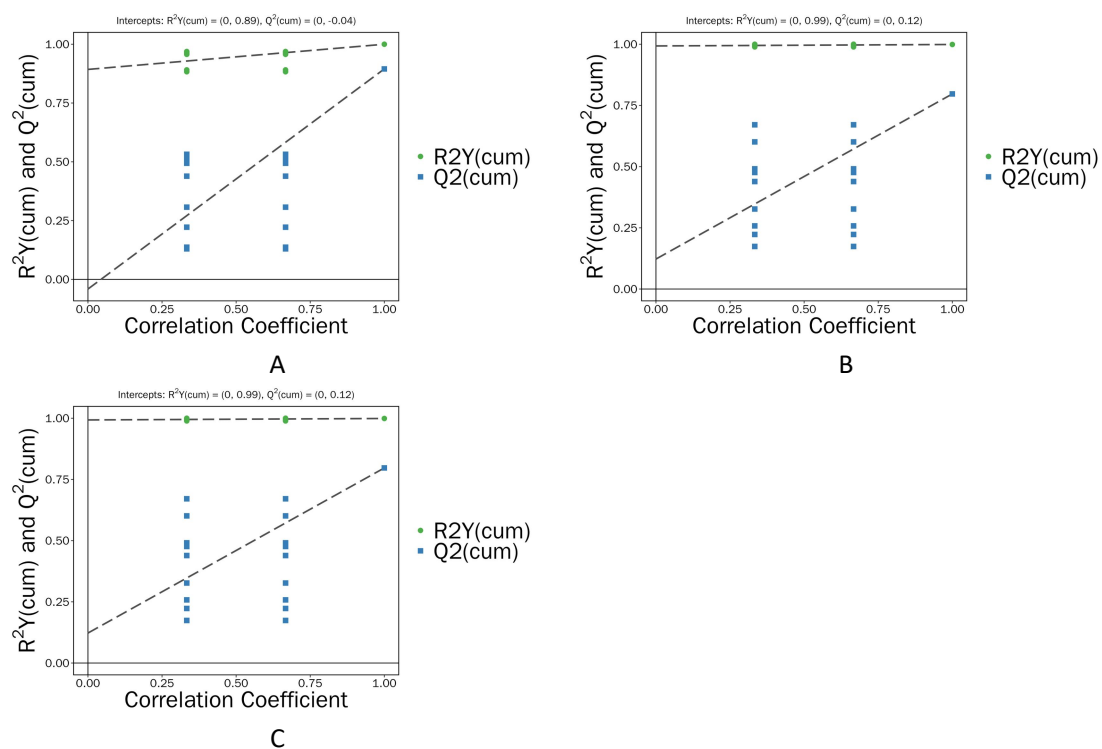

**Fig S3.** OPLS-DA permutation plot. (A) Site 1 (1H vs. 1D), (B) Site 2 (2H vs. 2D), and (C) Site 3 (3H vs. 3D).
